# Supplementary material
Source: Springer Nature journal article supplement (https://www.springermedizin.de/resource/supplementary/12913_2009_1150_MOESM6_ESM.pdf/9527734)
Supplement: MOESM6 [file 9527734]

**Department = ?**  
(n=96)

- Internal Medicine 1
- Clinical immunology
- Internal Medicine 2
- Diabetes care
- Nephrology

- Vascular Medicine
- Geriatrics

**Classification type = ?**  
(n=73)

**Anatomical Therapeutic Chemical classification = ?**  
(n=23)

- Inappropriate choice of drug and/or drug dose
- Wrong unit
- Wrong route
- Drug omission
- Duplicate order

- Drug-drug interaction

- Blood and blood forming organs
- Cardiovascular system
- Anti-infectives for systemic use

- Alimentary tract and metabolism
- Systemic hormonal preparations excluding sex hormones and insulins
- Musculo-skeletal system
- Nervous system
- Respiratory system
- Sensory organs
- Various

**Not reconducted**  
(n=62)

Correct decision 39 (63%)  
Incorrect decision 23 (37%)

**Reconducted**  
(n=11)

Correct decision 9 (82%)  
Incorrect decision 2 (18%)

**Not reconducted**  
(n=9)

Correct decision 5 (56%)  
Incorrect decision 4 (44%)

**Reconducted**  
(n=14)

Correct decision 14 (100%)  
Incorrect decision 0 (0%)
